# Supplementary material for: The Consumption of Alcoholic Beverages and the Prevalence of Cardiovascular Diseases in Men and Women: A Cross-Sectional Study
Source: PubMed Central journal article supplement (PMC6628509; doi:10.3390/nu11061318), 2019-06-12
Supplement: nutrients-11-01318-s001.pdf [file nutrients-11-01318-s001.pdf]

**Table S1.** Unadjusted odds ratios and 95% confidence intervals for cardiovascular diseases in men and women.

| CVD                 | Hypertension        |        | Stroke              |        | Coronary disease    |        | Circulatory failure |       |
|---------------------|---------------------|--------|---------------------|--------|---------------------|--------|---------------------|-------|
| Men                 |                     |        |                     |        |                     |        |                     |       |
| alcohol consumption | OR (95% CI)         | p      | OR (95% CI)         | p      | OR (95% CI)         | p      | OR (95% CI)         | p     |
| abstainers (ref.)   | 1.00                |        | 1.00                |        | 1.00                |        | 1.00                |       |
| 0.1-10.0 g          | 1.02<br>(0.84-1.23) | 0.810  | 0.69<br>(0.39-1.21) | 0.201  | 0.59<br>(0.45-0.77) | <0.001 | 0.73<br>(0.51-1.06) | 0.099 |
| 10.1-20.0 g         | 0.88<br>(0.70-1.10) | 0.257  | 0.51<br>(0.24-1.07) | 0.076  | 0.48<br>(0.34-0.68) | <0.001 | 0.62<br>(0.39-0.99) | 0.046 |
| 20.1-30.0 g         | 0.63<br>(0.46-0.85) | 0.003  | 0.31<br>(0.09-1.08) | 0.067  | 0.25<br>(0.14-0.46) | <0.001 | 0.25<br>(0.10-0.60) | 0.002 |
| >30.0 g             | 0.74<br>(0.48-1.14) | 0.177  | 0.14<br>(0.02-1.02) | 0.052  | 0.05<br>(0.01-0.34) | 0.002  | 0.70<br>(0.29-1.69) | 0.431 |
| Women               |                     |        |                     |        |                     |        |                     |       |
| abstainers (ref.)   | 1.00                | p      | 1.00                | p      | 1.00                | p      | 1.00                | p     |
| 0.1-5.0 g           | 0.67<br>(0.59-0.75) | <0.001 | 0.42<br>(0.29-0.62) | <0.001 | 0.51<br>(0.43-0.61) | <0.001 | 0.78<br>(0.63-0.97) | 0.024 |
| 5.1-10.0 g          | 0.51<br>(0.42-0.62) | <0.001 | 0.29<br>(0.12-0.70) | 0.005  | 0.38<br>(0.27-0.54) | <0.001 | 0.54<br>(0.37-0.81) | 0.028 |
| 10.1-15.0 g         | 0.37<br>(0.25-0.54) | <0.001 | 0.44<br>(0.11-1.84) | 0.261  | 0.24<br>(0.11-0.56) | 0.001  | 0.36<br>(0.14-0.90) | 0.028 |
| >15.0 g             | 0.49<br>(0.35-0.70) | <0.001 | 0.20<br>(0.03-1.49) | 0.117  | 0.31<br>(0.15-0.63) | 0.001  | 0.62<br>(0.31-1.25) | 0.181 |

OR – odds ratio; CI - confidence intervals; ref. – reference level
